# Supplementary figures and images for: Age and Suicide Among Veterans With a History of Homelessness
Source: Atypon-hosted journal article supplement (doi:10.1176/appi.ps.201300128), 2013-07-01

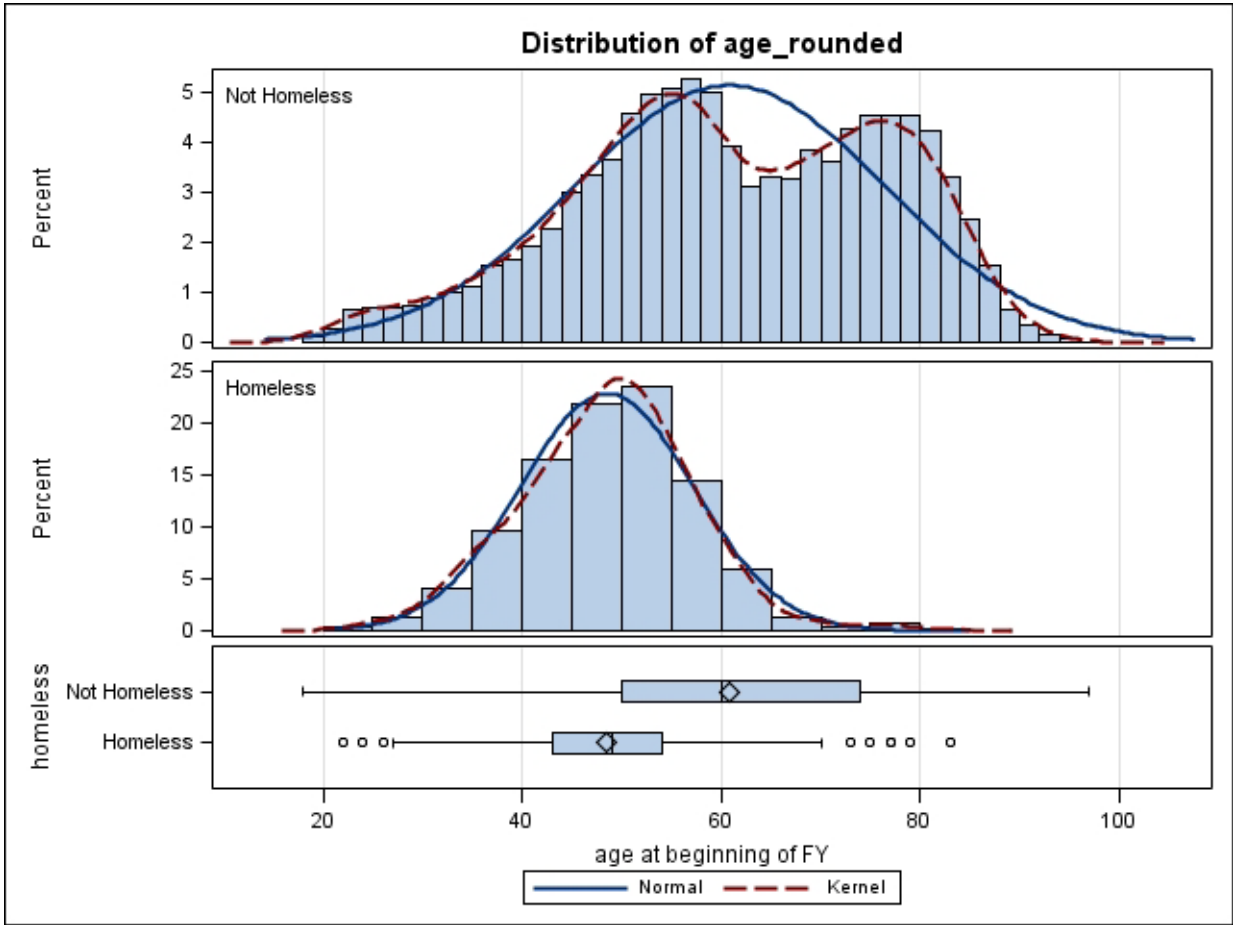

Supplement: 713b_ds001.pdf [file 713b_ds001.pdf]
